# Supplementary material for: Safety and Effects of Football in Skeletal Metastatic Prostate Cancer: a Subgroup Analysis of the FC Prostate Community Randomised Controlled Trial
Source: PubMed Central journal article supplement (PMC8058127; doi:10.1186/s40798-021-00318-6), 2021-04-20
Supplement: 40798_2021_318_MOESM1_ESM.pdf [file 40798_2021_318_MOESM1_ESM.pdf]

## Electronic Supplementary Material

This supplementary material has been provided by the authors to give readers additional information about their work.

Supplement to: Eik Dybboe Bjerre<sup>1</sup>, Sarah Weller<sup>2</sup>, Mads Hvid Poulsen<sup>3</sup>, Søren Sørensen Madsen<sup>4</sup>, Rie Dybboe Bjerre<sup>5</sup>, Peter Busch Østergren<sup>6</sup>, Michael Borre<sup>7</sup>, Klaus Brasso<sup>8</sup> and Julie Midtgaard<sup>9</sup>. Safety and effects of football in skeletal metastatic prostate cancer: A subgroup analysis from the ‘FC Prostate Community’ randomized controlled trial. Sports Medicine - Open.

Corresponding author: Eik Dybboe Bjerre; eik.dybboe.bjerre@regionh.dk, telephone: +4535457917 ORCID ID: 0000-0001-9370-5162

### **AUTHORS AFFILIATIONS AND ADDRESSES**

<sup>1</sup> The University Hospitals’ Centre for Health Research, Copenhagen University Hospital Rigshospitalet, Department 9701, Blegdamsvej 9, DK-2100 Copenhagen Ø, Denmark, eb@ucsf.dk

<sup>2</sup> Prostate Cancer Supportive Care Program, Vancouver Prostate Centre, Vancouver, Canada, sweller@prostatecentre.com

<sup>3</sup> Department of Urology, Odense University Hospital, Odense, Denmark and Academy of Geriatric Cancer Research, Odense University Hospital, Odense, Denmark, mads.poulsen@rsyd.dk

<sup>4</sup> Department of Urology, Hospital of Southwest, Denmark/Esbjerg, Esbjerg, Denmark, soeren.soerensen.madsen@rsyd.dk

<sup>5</sup> Herlev-Gentofte Hospital, University of Copenhagen, Hellerup, Denmark, rie.dybboe.bjerre@regionh.dk

<sup>6</sup> Department of Urology, Herlev and Gentofte University Hospital, Herlev, Denmark, peter.busch.oestergren@regionh.dk

<sup>7</sup> Department of Urology, Aarhus University Hospital, Aarhus, Denmark, borre@clin.au.dk

<sup>8</sup> Copenhagen Prostate Cancer Center, Department of Urology, Rigshospitalet, University of Copenhagen, Copenhagen, Denmark, klaus.brasso@regionh.dk

<sup>9</sup> The University Hospitals’ Centre for Health Research, Rigshospitalet, Copenhagen, Denmark and Department of Public Health, University of Copenhagen, Copenhagen, Denmark, julie.midtgaard.klausen@regionh.dk

| Supplementary Table 1. Means of outcomes at baseline, 12 weeks and 6 months |          |       |       |          |       |      |          |       |       |
|-----------------------------------------------------------------------------|----------|-------|-------|----------|-------|------|----------|-------|-------|
|                                                                             | Baseline |       |       | 12 weeks |       |      | 6 months |       |       |
|                                                                             | n        | Mean  | SD    | n        | Mean  | SD   | n        | Mean  | SD    |
| Prostate cancer-specific quality of life (points, higher is better)         |          |       |       |          |       |      |          |       |       |
| FG                                                                          | 22       | 124.2 | 18.9  | 21       | 122.5 | 18.8 | 20       | 119.2 | 20.4  |
| UC                                                                          | 19       | 121.2 | 15.5  | 18       | 112.7 | 16.4 | 16       | 117.8 | 17.3  |
| Lean body mass (kilograms)                                                  |          |       |       |          |       |      |          |       |       |
| FG                                                                          | 22       | 53.6  | 7.3   |          |       |      | 21       | 53.6  | 7.3   |
| UC                                                                          | 19       | 58.5  | 6.0   |          | NM    |      | 15       | 57.7  | 5.2   |
| Fat mass (kilograms)                                                        |          |       |       |          |       |      |          |       |       |
| FG                                                                          | 22       | 29.2  | 8.6   |          |       |      | 21       | 29.0  | 10.3  |
| UC                                                                          | 19       | 33.1  | 9.1   |          | NM    |      | 15       | 32.2  | 9.1   |
| Total hip bone mineral density (grams/cm <sup>2</sup> )                     |          |       |       |          |       |      |          |       |       |
| FG                                                                          | 22       | 1.101 | 0.122 |          |       |      | 21       | 1.141 | 0.202 |
| UC                                                                          | 19       | 0.981 | 0.143 |          | NM    |      | 15       | 0.985 | 0.147 |
| Spine bone mineral density (grams/cm <sup>2</sup> )                         |          |       |       |          |       |      |          |       |       |
| FG                                                                          | 22       | 1.184 | 0.281 |          |       |      | 21       | 1.235 | 0.356 |
| UC                                                                          | 19       | 1.317 | 0.306 |          | NM    |      | 15       | 1.343 | 0.342 |
| General physical health (SF-12)                                             |          |       |       |          |       |      |          |       |       |
| FG                                                                          | 22       | 48.8  | 8.9   | 21       | 46.5  | 9.0  | 20       | 45.4  | 10.1  |
| UC                                                                          | 19       | 50.2  | 6.9   | 18       | 46.7  | 8.7  | 16       | 47.6  | 10.2  |
| General mental health (SF-12)                                               |          |       |       |          |       |      |          |       |       |
| FG                                                                          | 22       | 53.0  | 6.1   | 21       | 53.1  | 7.7  | 20       | 50.9  | 11.1  |
| UC                                                                          | 19       | 51.9  | 8.0   | 18       | 50.1  | 6.5  | 16       | 49.6  | 8.2   |

Abbreviations: SD, standard deviation; NM, not measured.
